# Supplementary material for: Chemical proteomic profiling of lysine crotonylation using minimalist bioorthogonal probes in mammalian cells
Source: Royal Society of Chemistry journal article supplement (doi:10.1039/d4sc06745b), 2025-01-01
Supplement: d4sc06745b2.xlsx [file d4sc06745b2.xlsx]

## Sheet: Column description
Tab Name	Description
Kcr sites by Cr-alkyne	Results of the crotonylation sites identified by Cr-alkyne probe.
Histone Kcr sites by IP	Results of the histone crotonylation sites identified by anti-crotonyllysine antibody.
Kcr regulated by HDAC1	Results of quantitative proteomics unveiling crotonylation sites regulated by HDAC1 using Cr-alkyne.
Kcr regulated by HDAC3	Results of quantitative proteomics unveiling crotonylation sites regulated by HDAC3 using Cr-alkyne.
Column Name	Description
protein ID	Uniprot acession of the identified proteins
gene name	gene name of the identified proteins
sequence	Sequece and modified site of the identified peptides
NOTE
*	Lysine site modified by Cr-alkyne probe
#	Histone Kcr sites by IP

## Sheet: Kcr sites by Cr-alkyne
Modified peptide	Gene	Protein ID
n[43]ASNK*TTLQK	CBX3	Q13185
TTLQK*MGK	CBX3	Q13185
KK*KEPIEK	DDX21	Q9NR30
YGDGPRPPK*MAR	DHX9	Q08211
TFLRPPK*VK	DNAJC8	O75937
SAQK*AQK	EEF1A1	P68104
FAAK*GEGQLGPAER	EEF2	P13639
K*MGAMAKPDCIITCDGK	FABP5	Q01469
TGAAGK*FKR	FEN1	P39748
ISK*SRYDSIDSYLSK*CGEK	GCLC	P48506
KGVGLSNTK*AVK*PTK	GLCE	O94923
RPFLEPK*K	GTF2I	P78347
KAAGGATPK*K	H1-2	P16403
KAK*KPAAATVTK	H1-2	P16403
KAK*VAKPK	H1-2	P16403
KPAAATVTK*K	H1-2	P16403
n[43]SETAPAAPAAAPPAEKAPVK*K	H1-2	P16403
SAAK*AVKPK	H1-2	P16403
AK*AVKPK	H1-4	P10412
K*ATGAATPK	H1-4	P10412
K*SAGAAK	H1-4	P10412
KAK*AAKPK	H1-4	P10412
KAK*KPAAAAGAK	H1-4	P10412
GK*QGGKAR	H2AC11	P0C0S8
K*TESHHK	H2AC11	P0C0S8
KTESHHK*AK	H2AC11	P0C0S8
VTIAQGGVLPNIQAVLLPK*KTESHHK	H2AC11	P0C0S8
KTESHK*AK	H2AC20	Q16777
SGRGK*QGGK	H2AC20	Q16777
K*TESHKPGK	H2AC21	Q8IUE6
AGGK*AGKDSGK	H2AZ1	P0C0S5
AGK*DSGK	H2AZ1	P0C0S5
AGKDSGK*AK	H2AZ1	P0C0S5
ATIAGGGVIPHIHK*SLIGK	H2AZ1	P0C0S5
SLIGK*KGQQK	H2AZ1	P0C0S5
AQK*KDGK	H2BC11	P06899
AQKK*DGK	H2BC11	P06899
AVTK*AQK	H2BC11	P06899
K*AVTKAQK	H2BC11	P06899
KAVTKAQK*K	H2BC11	P06899
n[43]PEPAK*SAPAPK	H2BC11	P06899
PEPAK*SAPAPK	H2BC11	P06899
PELAK*SAPAPK	H2BC13	Q99880
AVTK*VQK	H2BC18	Q5QNW6
K*AVTKVQK	H2BC18	Q5QNW6
KAVTK*VQKK	H2BC18	Q5QNW6
LAHYNK*R	H2BC18	Q5QNW6
PDPAK*SAPAPK	H2BC18	Q5QNW6
SAPAPK*KGSKK	H2BC18	Q5QNW6
VQK*KDGK	H2BC18	Q5QNW6
PDPSK*SAPAPK	H2BC26	Q8N257
PEPSK*SAPAPK	H2BC3	P33778
PEPTK*SAPAPK	H2BC5	P58876
ARTK*QTAR	H3C1	P68431
K*QLATKAAR	H3C1	P68431
K*SAPATGGVKKPHR	H3C1	P68431
K*STGGKAPR	H3C1	P68431
KQLATK*AAR	H3C1	P68431
KSTGGK*APR	H3C1	P68431
GGK*GLGKGGAK	H4C1	P62805
GGKGLGK*GGAKR	H4C1	P62805
GK*GGKGLGK	H4C1	P62805
GKGGK*GLGKGGAKR	H4C1	P62805
GKGGKGLGK*GGAK	H4C1	P62805
GKGGKGLGK*GGAKR	H4C1	P62805
GKGGKGLGKGGAK*R	H4C1	P62805
GLGK*GGAKR	H4C1	P62805
GLGKGGAK*R	H4C1	P62805
SGRGK*GGKGLGK	H4C1	P62805
FK*DPNAPK	HMGB1	P09429
GKGDPK*KPR	HMGB1	P09429
GKPDAAK*K	HMGB1	P09429
KFK*DPNAPK	HMGB1	P09429
KGVVK*AEK	HMGB1	P09429
KK*FKDPNAPK	HMGB1	P09429
TYIPPK*GETK	HMGB1	P09429
GPAK*VAR	HMGB3	O15347
K*AEGDAKGDK	HMGN2	P05204
K*GEKVPK	HMGN2	P05204
KAEGDAK*GDKAK	HMGN2	P05204
KAEGDAKGDK*AK	HMGN2	P05204
KAPAK*KGEK	HMGN2	P05204
KGEKVPK*GK	HMGN2	P05204
LSAKPAPPKPEPK*PKKAPAK	HMGN2	P05204
LSAKPAPPKPEPKPK*KAPAK	HMGN2	P05204
LTDCVVMRDPASK*R	HNRNPA2B1	P22626
AVVPSK*R	HNRNPC	P07910
n[43]ASNVTNK*TDPR	HNRNPC	P07910
SGFNSK*SGQR	HNRNPC	P07910
TAAAPK*AGPGVVR	MAPRE1	Q15691
DLVAQAPLKPK*TPR	MTA2	O94776
AAATPAK*K	NCL	P19338
AAVTPGK*K	NCL	P19338
ALVATPGK*K	NCL	P19338
AVTTPGK*K	NCL	P19338
GAAIPAK*GAK	NCL	P19338
K*AAATPAK	NCL	P19338
K*AAATSAK	NCL	P19338
K*AAVTPGKK	NCL	P19338
K*GAAIPAK	NCL	P19338
K*GATPGK	NCL	P19338
K*TVTPAK	NCL	P19338
K*VAVATPAK	NCL	P19338
KAAATSAK*K	NCL	P19338
KAAVTPGK*K	NCL	P19338
KGATPGK*ALVATPGK	NCL	P19338
KTVTPAK*AVTTPGK	NCL	P19338
KVVVSPTK*K	NCL	P19338
TVTPAK*AVTTPGKK	NCL	P19338
VAVATPAK*K	NCL	P19338
VAVATPAKK*	NCL	P19338
VKLAK*AGK	NCL	P19338
VVPVK*AK	NCL	P19338
KGAK*FLR	NDNF	Q8TB73
AAPGAEFAPNK*R	NONO	Q15233
DTPAK*NAQK	NPM1	P06748
K*SIRDTPAK	NPM1	P06748
SAPGGGSK*VPQKK	NPM1	P06748
SAPGGGSKVPQK*K	NPM1	P06748
SIRDTPAK*NAQK	NPM1	P06748
SK*GQESFK	NPM1	P06748
SKGQESFK*KQEK	NPM1	P06748
ATVTPSPVK*GK	NUCKS1	Q9H1E3
GK*VGRPTASK	NUCKS1	Q9H1E3
LK*ATVTPSPVK	NUCKS1	Q9H1E3
GQVKEEGINK*SEK	PARP1	P09874
GQVKEEGINKSEK*R	PARP1	P09874
SGAALSK*K	PARP1	P09874
SAEEEAADLPTKPTK*ISK	PCNP	Q8WW12
K*GGAGGK	PDCD4	Q53EL6
NFATK*MGAK	PFKM	P08237
NFGTK*ISAR	PFKP	Q01813
APSAPVGK*	PI2R	P43119
K*YEPPVPTR	PSMC1	P62191
IEK*NPAR	PSPC1	Q8WXF1
KFK*GDSR	PTBP1	P26599
KK*NLQYYDISAK	RAN	P62826
KEVPK*QQAAYR	RCC2	Q9P258
RSSQTQNK*ASR	SETSIP	P0DME0
K*AQPQDSR	SF3B2	Q13435
GGK*MPGGPKPGGGPGLSTPGGHPKPPHR	SFPQ	P23246
K*DQYFLDKK	SMC3	Q9UQE7
K*GTVEGFEPADNK	SRP14	P37108
GK*VQFQGK	SSB	P05455
AQYVLAK*R	THUMPD1	Q9NXG2
AKTPVTLK*QR	TMPO	P42167
AHSSHLK*SK	TP53	P04637
VHNSTQK*R	UBE2T	Q9NPD8
HRPQK*VGAYR	WIZ	O95785
AFK*WHSSLAK	ZNF735	P0CB33

## Sheet: Histone Kcr sites by IP
Modified Peptide	Gene	Protein ID
n[43]SETAPAAPAAAPPAEK#APVK	H1-2	P16403
n[43]SETAPAAPAAPAPAEKTPVK#K	H1-4	P10412
n[43]SETAPAAPAAPAPAEK#TPVK	H1-4	P10412
VTIAQGGVLPNIQAVLLPK#KTESHK	H2AC20	Q16777
VTIAQGGVLPNIQAVLLPKK#	H2AC20	Q16777
VTIAQGGVLPNIQAVLLPKKTESHHK#	H2AC4	P04908
KTSATVGPK#APSGGK	H2AX	P16104
K#GHYAERVGAGAPVYLAAVLEYLTAEILELAGNAAR	H2AX	P16104
VGAGAPVYLAAVLEYLTAEILELAGNAARDNK#K#	H2AX	P16104
n[43]AGGKAGK#DSGK	H2AZ1	P0C0S5
ATIAGGGVIPHIHK#SLIGK	H2AZ1	P0C0S5
PELAKSAPAPK#K	H2BC13	Q99880
PELAK#SAPAPK	H2BC13	Q99880
PEPSK#SAPAPK	H2BC15	Q99877
PDPAKSAPAPK#K	H2BC18	Q5QNW6
PDPAK#SAPAPK	H2BC18	Q5QNW6
LAHYNK#RSTITSR	H2BC20P	Q6DN03
PEPAKSAPAPK#K	H2BC21	Q16778
n[43]PEPAK#SAPAPK	H2BC21	Q16778
LLLPGELAK#HAVSEGTK	H2BC21	Q16778
PEPTKSAPAPK#K	H2BC5	P58876
PEPTK#SAPAPK	H2BC5	P58876
PDPSK#SAPAPK	H2BU1	Q8N257
n[43]PDPSKSAPAPK#K	H2BU1	Q8N257
IASEASRLAHYNK#R	H2BU1	Q8N257
FQSSAVMALQEAREAYLVGLFEDTNLCAIHAK#	H3-2	Q5TEC6
FQSAAIGALQEASEAYLVGLFEDTNLCAIHAK#	H3-3A	P84243
EIAQDFK#TDLR	H3C1	P68431
VTIMPK#DIQLAR	H3C1	P68431
KQLATK#AAR	H3C15	Q71DI3
K#QLATKAAR	H3C15	Q71DI3
YQK#STELLIR	H3C15	Q71DI3
FQSSAVMALQEASEAYLVGLFEDTNLCAIHAK#	H3C15	Q71DI3
TDLRFQSSAVMALQEASEAYLVGLFEDTNLCAIHAK#	H3C15	Q71DI3
K#VLRDNIQGITKPAIR	H4C1	P62805
GVLK#VFLENVIR	H4C1	P62805

## Sheet: Kcr regulated by HDAC1
	Ratio(WT/HDAC1 Knock down)			Ratio(WT/HDAC1 Vector)
Kcr Site	repeat 1	repeat 2	repeat 3	repeat 1	repeat 2	repeat 3
NONO-K467	1.29998	1.23768	1.2424	1.29354	1.37906	1.49534
H2AZ1-K8	0.65239	0.743869	0.69813	1.06949	1.05775	1.06362
RAN-K134	0.780839	0.862093	0.769015	0.916655	1.11154	0.925649
TTC12-K168	0.556749	0.676438	0.557025	1.62765	1.82404	1.33714
H2B-K23	0.59146	1.09363	0.844084	0.423436	1.06338	1.26491
H2B-K20	0.70816	0.790745	1.10311	1.75184	1.27204	1.37421
H2B2F-K20	0.622315	0.745854	0.950983	1.93427	1.66194	1.50891
NCL-K109	0.85565	1.0178	0.936725	1.24252	1.17282	1.20767
HNRNPC-K157	0.815896	1.02089	1.03937	0.896957	1.40668	1.44622
NPM1-K202	0.984366	1.20844	1.0964	1.42347	1.54658	1.48502
H4-K8	0.670292	0.536529	0.839409	1.77145	1.02597	1.07133
H4-K12	0.689634	1.31447	0.938049	0.846177	1.065	1.0131
H2A-K119	1.20036	1.2658	1.88281	2.07237	5.87356	3.40811
H2A-K125	1.11679	2.13599	1.62639	3.17948	3.58176	3.38062
PFKP-K688	0.767552	1.1523	1.4617	1.17416	1.39647	1.55104
H3-K23	0.751523	0.787829	0.769676	1.34281	1.3934	1.36811
H2B-K11	0.594982	0.756898	0.597271	2.79571	1.19317	1.11672
SETLP-K199	0.651147	0.956226	0.720635	1.23953	1.72494	1.34867

## Sheet: Kcr regulated by HDAC3
	Ratio(WT/HDAC3 Knock down)			Ratio(WT/HDAC3 Vector)
Kcr Site	Repeat 1	Repeat 2	Repeat 3	Repeat 1	Repeat 2	Repeat 3
NONO-K467	1.0648	1.31077	1.28371	1.07312	1.58683	1.50111
RAN-K134	0.93528	1.0533	1.01976	0.927916	1.106	1.1597
H2B-K20	0.790817	0.858328	0.827336	1.14785	1.28519	1.2559
H4-K8	0.778323	0.82167	0.859657	1.118	0.960026	1.15116
H4-K12	0.804494	0.931454	0.867974	0.910581	0.924358	0.91747
PFKP-K688	0.702632	0.857655	0.810229	1.02085	0.898243	0.930667
H2B-K11	0.741233	0.793581	0.767942	1.12417	1.26125	0.999743
CBX3-K20	0.717489	1.06271	0.890098	1	1	0.9
H2A-K198	0.902125	1.17459	1.03836	1.34685	1.76635	1.5566
